# Supplementary material for: Mitochondrial ROS and base excision repair steps leading to DNA nick formation drive ultraviolet induced-NETosis
Source: PubMed Central journal article supplement (PMC10282603; doi:10.3389/fimmu.2023.1198716), 2023-06-07
Supplement: DataSheet_1.pdf [file DataSheet_1.pdf]

**Supplemental Figures:**

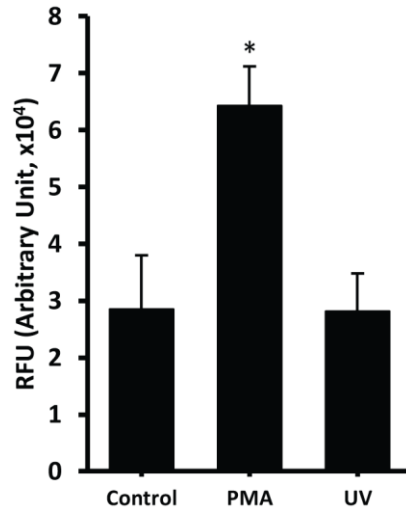

**Figure S1: PMA, but not UV, induces NOX ROS.** Neutrophils were treated with media, PMA or UV, and then incubated with ROS detection fluorescence probe DHR123. The ROS-oxidized probe was quantified using plate reader assays (R123 fluorescence; n = 3; \*, p<0.05 compared to media control, One-way ANOVA with Dunnett's multiple comparison test).

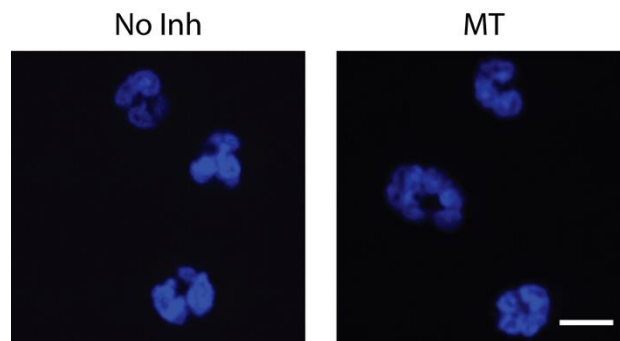

**Figure S2. MitoTempo does not induce apoptosis in neutrophils within 4 hours.** Neutrophils were incubated with media or MitoTempo (100  $\mu$ M) and incubated for 240 min. Cells were stained for DNA (DAPI, blue). Images are representative of three independent experiments (scale bar, 10  $\mu$ m).

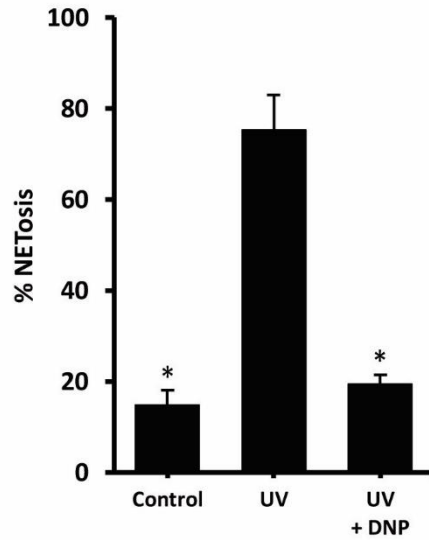

**Figure S3. UV induces mitochondrial ROS-mediated NETosis.** DNA release following UV (1.92 J/cm<sup>2</sup>) exposure was measured using SYTOX Green plate reader assay (n = 3; error bars represent SEM; \*p < 0.05 compared to the cells treated with UV alone; One-way ANOVA with Dunnett's multiple comparison test). Cells were preincubated with DNP (750 μM) for 1-h prior to UV treatment. DNP significantly inhibits UV-induced NETosis.

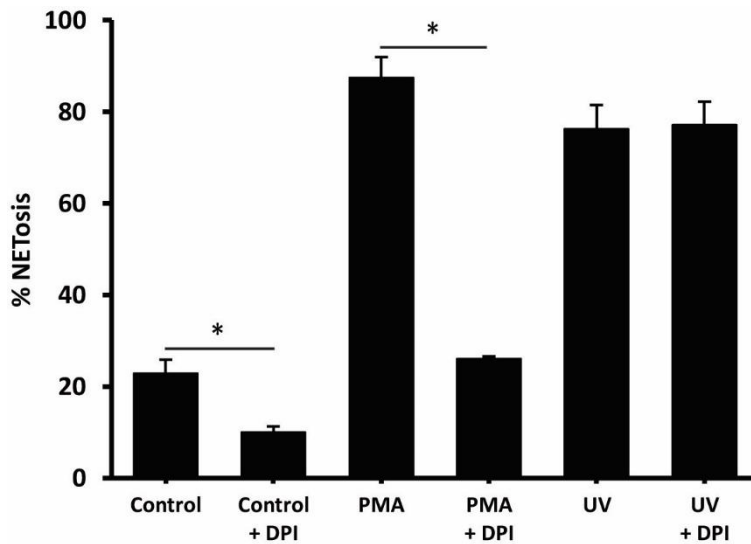

**Figure S4. UV induces NOX-independent NETosis.** DNA release following UV (1.92 J/cm<sup>2</sup>) exposure was measured using SYTOX Green plate reader assay (n = 3; error bars represent SEM; \*p < 0.05; Two-way ANOVA with Tukey's post test). Cells were preincubated with DPI (1 μM) for 1-h prior to UV treatment. DPI significantly inhibits PMA-induced NETosis but not UV-induced NETosis.
